# Supplementary material for: An extremely stable and sensitive end-column electrochemical detector based on heated copper microdisk electrode with direct current for CE and CE-Chip
Source: Royal Society of Chemistry journal article supplement (doi:10.1039/b927327a), 2010-01-01
Supplement: b927327a.pdf [file b927327a.pdf]

## † Electronic Supplementary Information (ESI)

Qi-Zhen Chen, Yi-Min Fang, Hang Wei, Zong-Xiong Huang, Guo-Nan Chen, Jian-Jun Sun\*

Key Laboratory of Analysis and Detection for Food Safety, Ministry of Education, College of Chemistry and Chemical Engineering, Fuzhou University, Fuzhou 350108, P. R. China

E-mail: [jjsun@fzu.edu.cn](mailto:jjsun@fzu.edu.cn)

5

### 1. Measurement of temperature coefficient for HWCE

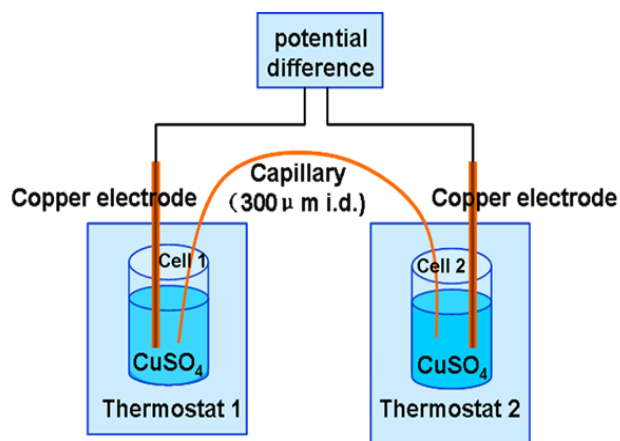

10 Figure S1. Schematic diagram for measurement of temperature coefficient by open circuit electrode potentials measured between two 360 $\mu$ m diameter Cu electrodes in two similar cells. Cell 1: 0.1 M CuSO<sub>4</sub> + 0.1 M H<sub>2</sub>SO<sub>4</sub> at 25  $\pm$  0.1 $^{\circ}$ C; cell 2: the same solution with variable temperature.

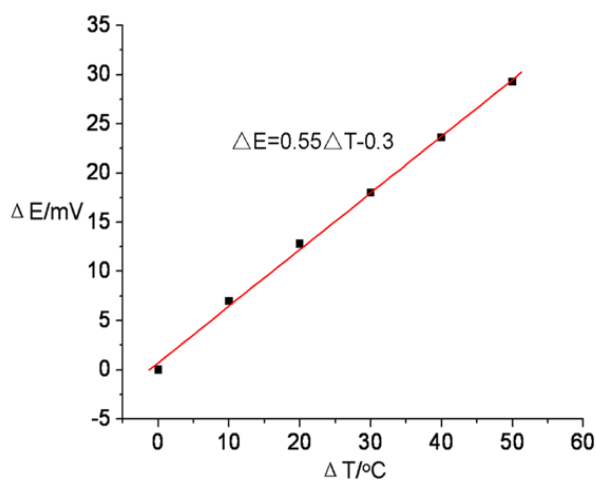

15 Figure S2. Relationship between  $\Delta E$  and  $\Delta T$ ;  $\Delta E$  is the potential difference between two Cu electrode surfaces;  $\Delta T$  is the temperature difference between the two cells.

The temperature coefficient of Cu/Cu<sup>2+</sup> was measured by dipping two copper wire to a separate container filled with 0.1 M CuSO<sub>4</sub> and 0.1 M H<sub>2</sub>SO<sub>4</sub> as shown in Figure S1. The container was kept in a separate thermostat, and electrical connected by a capillary which was full of 0.1 M CuSO<sub>4</sub> and 0.1 M H<sub>2</sub>SO<sub>4</sub> solution. The potential difference was measured after a equilibration time of 30 mins. Figure S2 shows the potential difference vs the elevated temperature. The temperature coefficient of Cu/Cu<sup>2+</sup> is 0.55mV/ $^{\circ}$ C.

### 2. Cyclic voltammograms (CVs) of three carbohydrates and shikimic acid (SA) at HCME

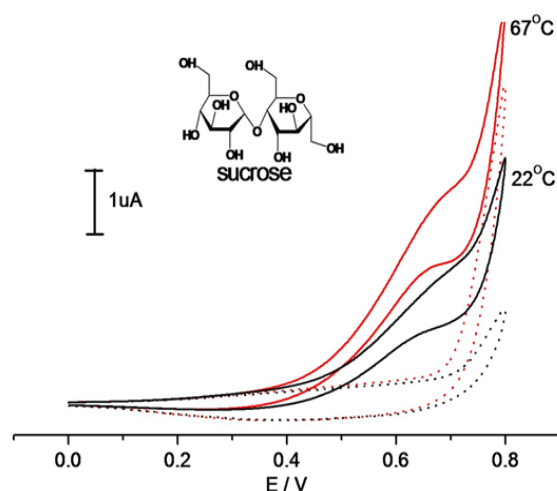

30 Figure S3. CVs of HCME in 0.02 M NaOH before (dashed line) and after (solid line) addition of 3 mM sucrose at two electrode temperature: 22  $^{\circ}$ C (black line) and 67  $^{\circ}$ C (red line). Scan rate: 100 mV $\cdot$ s<sup>-1</sup>

35

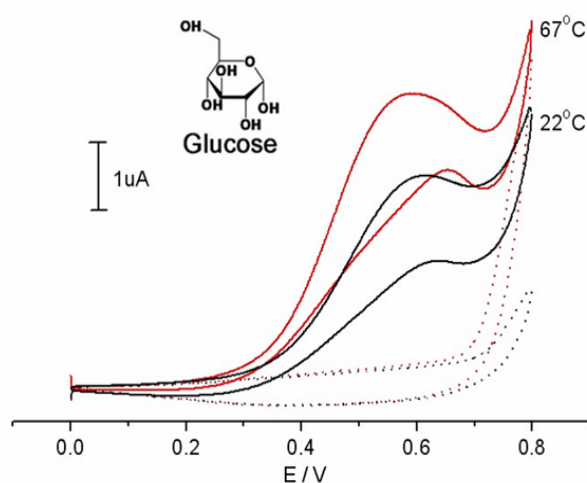

Figure S4. CVs of HCME in 0.02 M NaOH before (dashed line) and after (solid line) addition of 3 mM glucose at two electrode temperature: 22  $^{\circ}$ C (black line) and 67  $^{\circ}$ C (red line). Scan rate: 100 mV $\cdot$ s<sup>-1</sup>

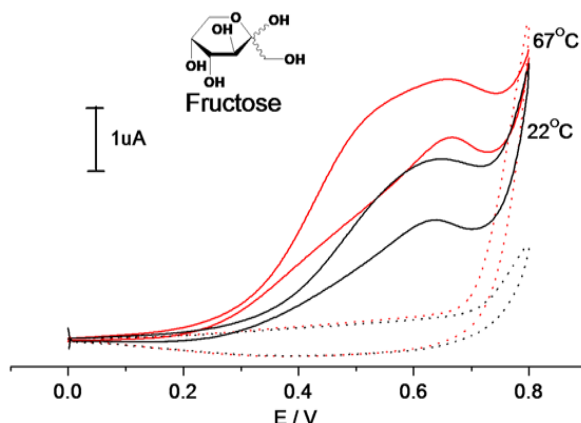

Figure S5. CVs of HCME in 0.02 M NaOH before (dashed line) and after (solid line) addition of 3 mM fructose at two electrode temperature: 22 °C (black line) and 67 °C (red line). Scan rate: 100 mV·s<sup>-1</sup>

5

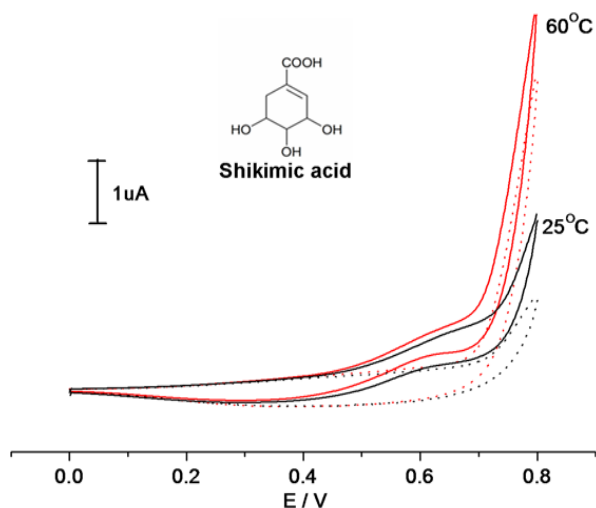

Figure S6. CVs of HCME in 0.02 M NaOH before (dashed line) and after (solid line) addition of 3 mM shikimic acid at two electrode temperature: 25 °C (black line) and 60 °C (red line). Scan rate: 100 mV·s<sup>-1</sup>

10

### 3. The Optimization of CE-ECD conditions.

#### Effect of detection potential, NaOH concentration and separation Voltage

The potential applied to the HCME directly affects the sensitivity, detection limits. Thus, the potential was investigated towards three carbohydrates by changing from 0.6 V to 1.0 V (versus SCE). When the potential was less than 0.6V, no obvious amperometric signal was observed. With increasing potential from 0.6V to 0.8V the amperometric signal increased rapidly. When the potential was higher than 0.8V, there was a significant increase in the background current due to the onset of oxygen evolution. Thus, an

operating potential of 0.8 V gave the best compromise between signal and background, and therefore was selected for subsequent CE amperometric detection in NaOH solution.

In an attempt to optimize the separation of carbohydrates, the composition of the electrophoresis medium was changed with 10, 20, 30, 40 and 50 mM NaOH. Because the NaOH concentration affects their resolution. When the NaOH concentration less than 20mM, it is difficult to distinguish glucose and fructose. When NaOH buffer concentration was further increased above 20 mM, the migration time became too long, and the separation did not improve with increasing the current intensity too much. Thus, the optimum concentration was fixed at 20 mM, which gave short migration time and good resolution.

The amperometric signal increased with the increase of injection time from 6 to 12 s, or with the increase of injection voltage from 9 to 18 kV. However, the resolution was improved at lower injection voltage and injection time. Therefore, 15 kV for 10 s was chosen as the suitable injection parameters. The separation voltage also was investigated; in view of the Joule heating problem and the generation of high background, a separation voltage of 15 kV was employed.

### 4.5 4. The Optimization of CE-Chip-ECD conditions.

#### Effect of detection potential, NaOH concentration and separation Voltage

Electrochemical response of SA at oxide covered copper electrode was investigated. The response can hardly be observed when the applied potential is lower than 0.6V, and increases with higher potential. However, it goes down when the potential is higher than 0.8V. This can be ascribed to the thicker oxide layer formed at higher potential, which hinders the electron transfer<sup>[S1]</sup>. The baseline also becomes unstable at high potential. Thus, 0.8V was adapted for detection.

The concentration of NaOH can also influence the separation time, current and efficiency. It was found that, the efficiency is low when the concentration is less than 20 mmol/L, and higher concentration would result in the instability of baseline. Therefore, 20 mmol/L was considered as the best.

Regarding the separation voltage, we investigated it in the range of 1000~1800 V, the best voltage is 1500 V. Sampling through the fracture is in the advantage of shorter time and lower injection voltage requirement, as well as less zone broadening<sup>[S2-S4]</sup>. It was found that, more time was consumed when the injection voltage is less than 300V. This would result in the zone broadening and lower separation efficiency. We finally chose 300V-3s ( an optimum injection voltage of 300 V at the injection time of 3 s ) as the optimized condition.

### 70 Reference

- [S1] C. D. Garcí'a., C. S. Henry, *Anal. Chem.*, **2003**, *75*, 4778-4783.
- [S2] D. J. Harrison, K.Fluri, K. Seiler, Z.Fan, C. S. Effenhauser, A. Manz, *Science*, **1993**, *261*, 895-897.
- [S3] C. X. Zhang, A. Manz, *Anal. Chem.*, **2001**, *73*, 2656-2662.
- [S4] N. P. Beard, C. X. Zhang, A. J. deMello, *Electrophoresis*, **2003**, *24*, 732-739.
